# Supplementary material for: Hydrothermal transformation from Au core–sulfide shell to Au nanoparticle-decorated sulfide hybrid nanostructures
Source: Royal Society of Chemistry journal article supplement (doi:10.1039/c0nr00302f), 2010-01-01
Supplement: c0nr00302f.pdf [file c0nr00302f.pdf]

## Electronic Supplementary Information

### Hydrothermal transformation from Au core–sulfide shell to Au nanoparticle-decorated sulfide hybrid nanostructures

Zhihong Bao,<sup>ab</sup> Zhenhua Sun,<sup>a</sup> Manda Xiao,<sup>a</sup> Linwei Tian<sup>\*b</sup> and Jianfang Wang<sup>\*a</sup>

<sup>a</sup> Department of Physics, The Chinese University of Hong Kong, Shatin, Hong Kong SAR, China. Fax: +852 2603 5204; Tel: +852 3163 4167; E-mail: jfwang@phy.cuhk.edu.hk

<sup>b</sup> School of Public Health, The Chinese University of Hong Kong, Shatin, Hong Kong SAR, China. Fax: +852 2635 4977; Tel: +852 2252 8884; E-mail: linweit@cuhk.edu.hk

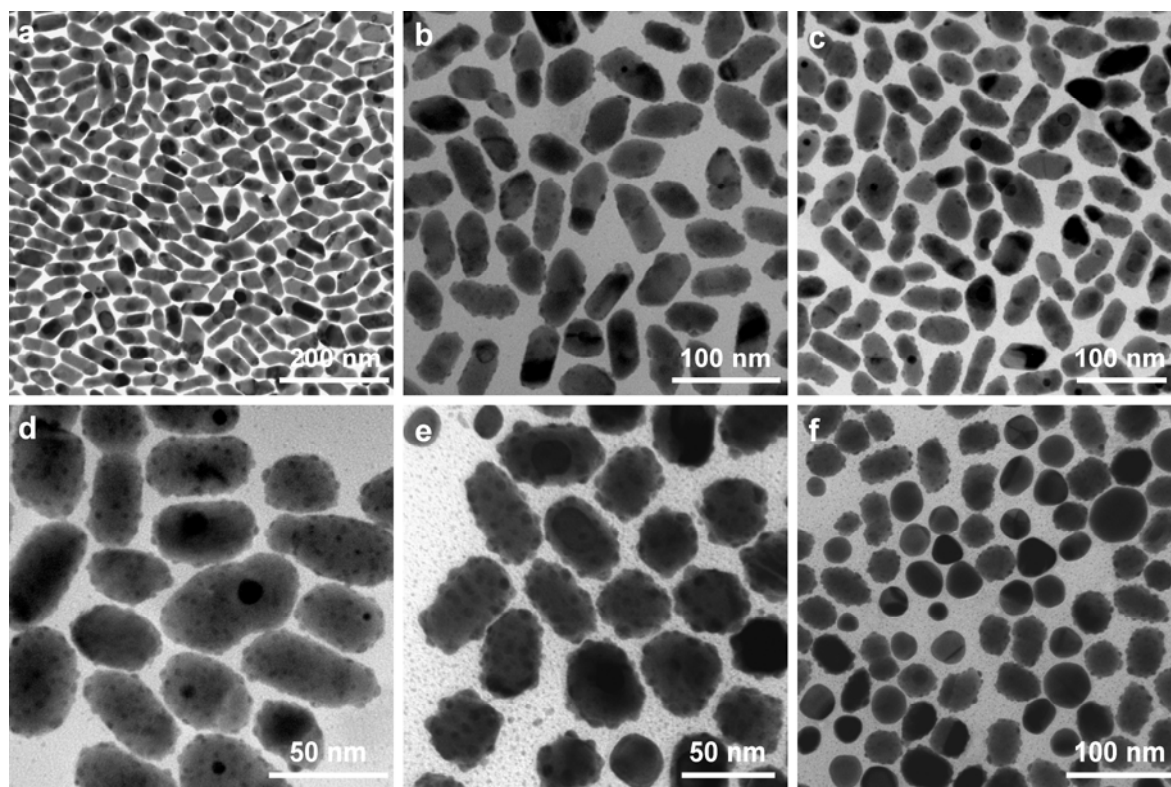

**Fig. S1** (a–f) TEM images of the hybrid gold–gold silver sulfide nanostructures obtained from the hydrothermal process for 6, 12, 15, 18, 36, and 48 h, respectively. The low-magnification imaging was performed on an FEI CM120 microscope.

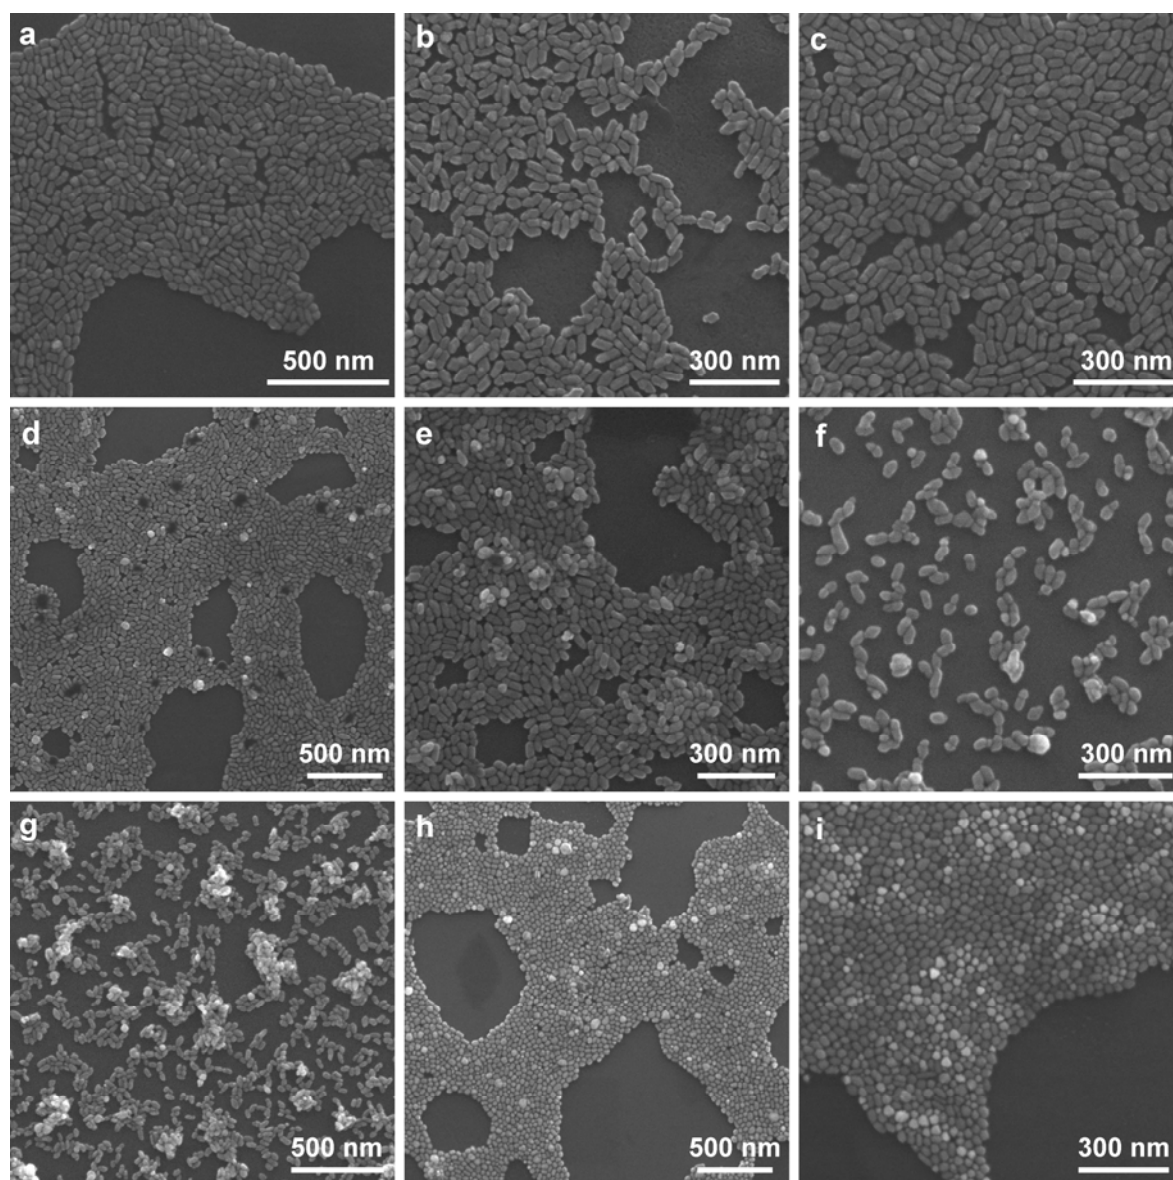

**Fig. S2** (a–i) SEM images of the hybrid gold–gold silver sulfide nanostructures obtained from the hydrothermal process for 3, 6, 9, 12, 15, 18, 24, 36, and 48 h, respectively. The SEM imaging was carried out on an FEI Quanta 400 microscope equipped with an Oxford EDX analysis system. The nanostructure samples were deposited on conductive Si substrates for the SEM imaging.

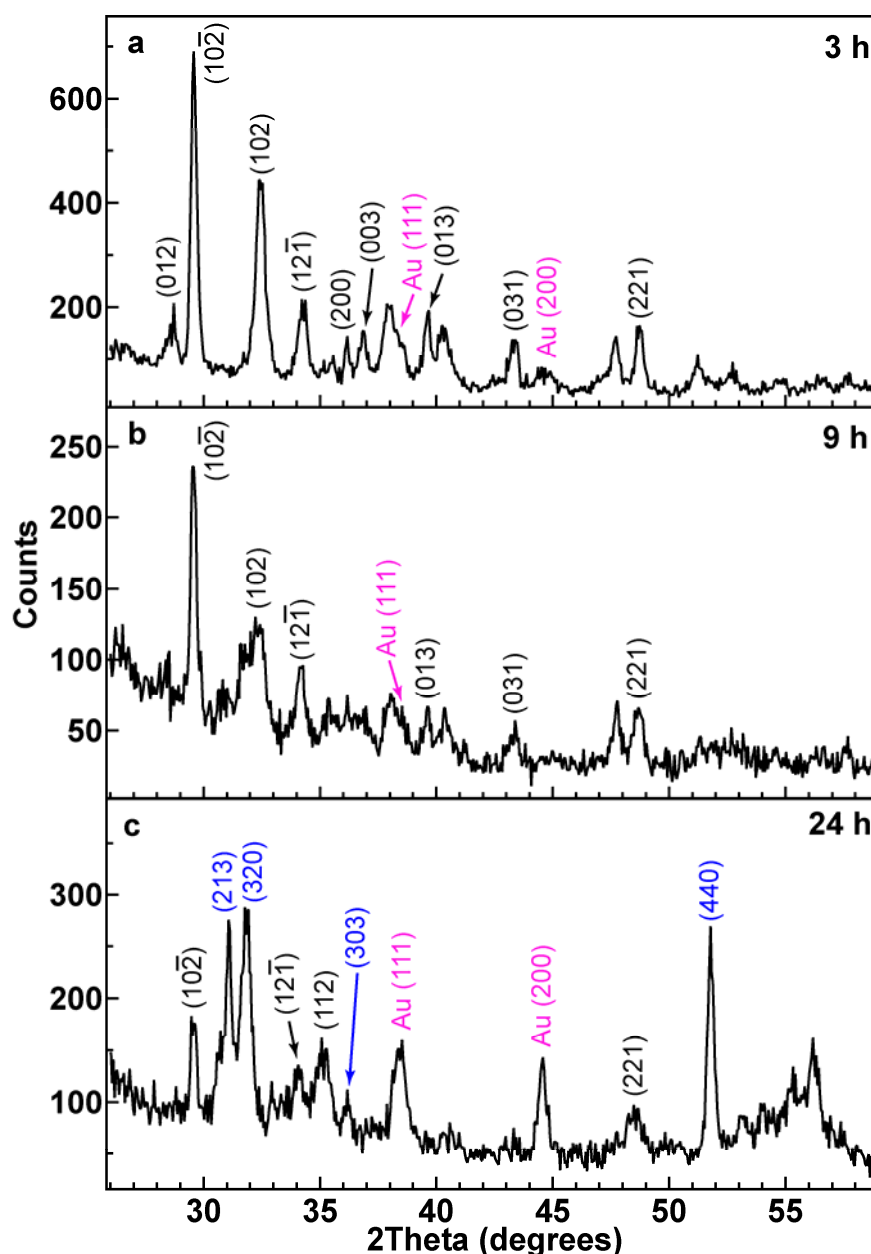

**Fig. S3** XRD patterns of the hybrid gold–gold silver sulfide nanostructures produced by the hydrothermal process for (a) 3 h, (b) 9 h, and (c) 24 h, respectively. The diffraction peaks in (a) and (b) are indexed as a combination of the monoclinic Petrovskite form of AgAuS (black indices, JCPDS 38-0396) and the face-centered-cubic form of Au (pink indices, JCPDS 65-2870). The diffraction peaks in (c) are indexed as a combination of the monoclinic Petrovskite form of AgAuS (black indices, JCPDS 38-0396), the tetragonal Liujinyinite form of Ag<sub>3</sub>AuS<sub>2</sub> (blue indices, JCPDS 44-1466), and the face-centered-cubic form of Au (pink indices, JCPDS 65-2870). The peaks at 38.0°, 40.3°, and 47.7° in (a) and (b), and that at 56.2° in (c) cannot be indexed, which can probably be ascribed to that gold silver sulfide possesses a number of crystalline phases. The XRD patterns were recorded on a Bruker D8 Advance diffractometer at 40 kV and 40 mA with Cu<sub>Kα1</sub> radiation ( $\lambda = 1.54056 \text{ \AA}$ ). The nanostructure samples were washed by centrifugation to remove the CTAB molecules and then deposited on Si substrates for the measurement, because CTAB can form liquid crystals when it is dried.

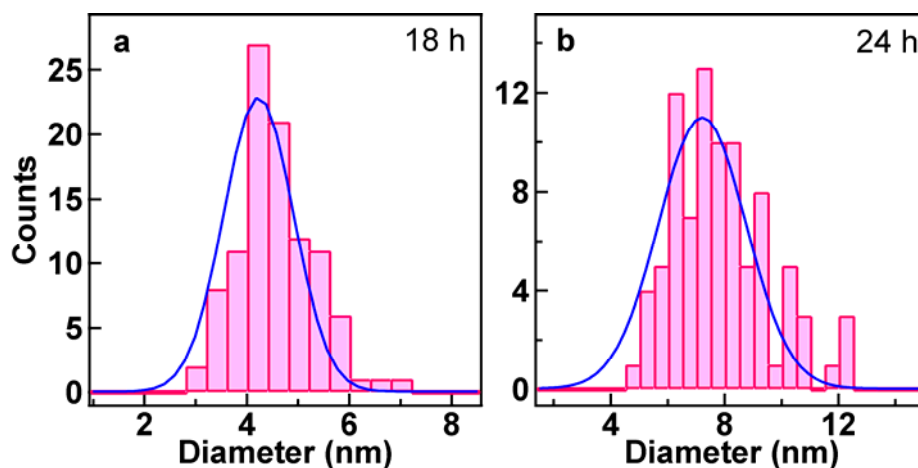

**Fig. S4** Size distributions of the Au nanoparticles decorated on the exterior surface of the sulfide nanostructures produced by the hydrothermal process for (a) 18 h and (b) 24 h, respectively. The average sizes for (a) and (b) are  $(4.2 \pm 0.7)$  and  $(7.2 \pm 1.5)$  nm, respectively.

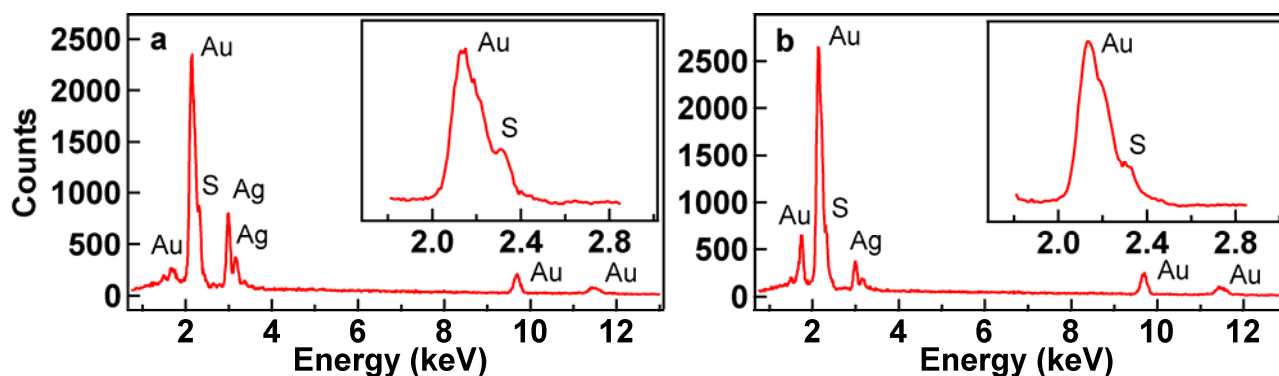

**Fig. S5** EDX spectra of the hybrid gold–gold silver sulfide nanostructures produced by the hydrothermal process for (a) 3 h and (b) 15 h.

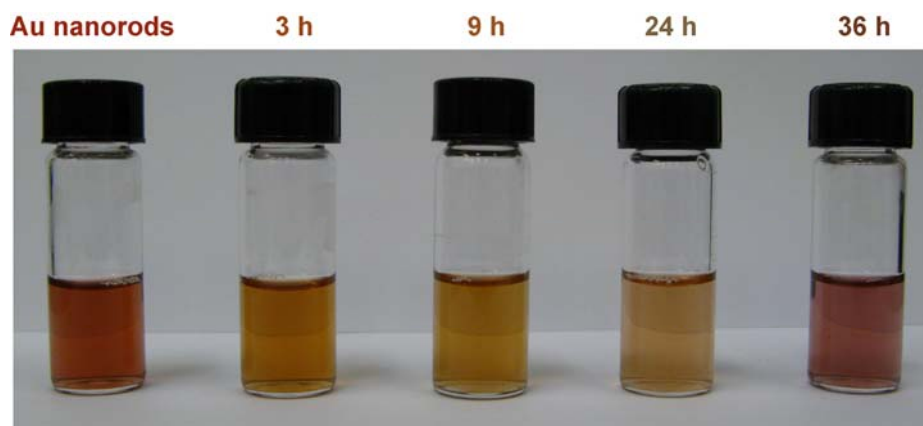

**Fig. S6** Digital photo of the hybrid gold–gold silver sulfide nanostructures.
